# Supplementary material for: Veverimer in Treating Metabolic Acidosis in Chronic Kidney Disease Patients: A Systematic Review and Meta-Analysis of Randomized Clinical Trials
Source: Research Square preprint supplement (doi:10.21203/rs.3.rs-6531618/v1), 2025-05-08
Supplement: Supplementary file 1 [file 682cbc9c309e74bfebfd67e0.docx]

| PICO | | | |
| --- | --- | --- | --- |
| Outcome | Comparison | Intervention | Population |
| Serum Bicarbonate Levels | Placebo | Veverimer | Chronic Kidney Disease |

| **PubMed** | | | | |
| --- | --- | --- | --- | --- |
| **# of results** | | **Query** | | **Search** |
| 28 | | (Veverimer[Title/Abstract]) OR (TRC101[Title/Abstract]) OR "veverimer" [Supplementary Concept] | | #1 (Veverimer) |
| **28** | | #1 | | **Final** |
| **Web of Science** | | | | |
| **# of results** | **Query** | | **Search** | |
| 35 | (TI=(“Veverimer” OR “TRC101”)) OR AB=(“Veverimer” OR “TRC101”) | | #1 (Veverimer) | |
| **35** | #1 | | **Final** | |
| **Scopus** | | | | |
| **# of results** | **Query** | | **Search** | |
| 39 | TITLE-ABS-KEY ( "Veverimer" OR "TRC101" ) | | #1 (Veverimer) | |
| **39** | #1 | | **Final** | |
| **# of results** | **Embase** | | **Search** | |
| 66 | 'trc101'/exp OR trc101 OR 'veverimer'/exp OR veverimer | | #1 (Veverimer) | |
| **66** | #1 | | **Final** | |
| **Clinicaltrials.gov** | | | | |
| **# of results** | **Query** | | **Search** | |
| 4 | “Veverimer” OR “TRC101” | | #1 (Veverimer) | |
| **4** | #1 | | **Final** | |
| **Cochrane Central Register of Controlled Trials** | | | | |
| **# of results** | **Query** | | **Search** | |
| 33 | “Veverimer” OR “TRC101” in Title Abstract Keyword | | #1 (Veverimer) | |
| **33** | #1 | | **Final** | |

Table S1. Search strategy
