# Supplementary material for: Veverimer in Treating Metabolic Acidosis in Chronic Kidney Disease Patients: A Systematic Review and Meta-Analysis of Randomized Clinical Trials
Source: Research Square preprint supplement (doi:10.21203/rs.3.rs-6531618/v1), 2025-05-08
Supplement: Supplementary file 2 [file 97baef79665932f1471544c9.docx]

| Study |  | | | | | | |
| --- | --- | --- | --- | --- | --- | --- | --- |
| Tangri (2024) (1) | Side effect | | veverimer | | | placebo | |
| Hypertension | | 65 (8.8%) | | | 71 (9.6%) | |
| Hyperkalemia | | 75 (5.4%) | | | 43 (5.8%) | |
| Covid-19 | | 39 (5.3%) | | | 54 (7.3%) | |
| Headache | | 39 (5.3%) | | | 37 (5%) | |
| Anemia | | 38 (5.1%) | | | 36 (4.9%) | |
| Renal impairment | | 21 (2.8%) | | | 18 (2.4%) | |
| Covid-19 pneumonia | | 20 (2.7%) | | | 31 (4.2%) | |
| Diabetes mellitus | | 20 (2.7%) | | | 24 (3.3%) | |
| Diarrhea | | 18 (2.4%) | | | 30 (4.1%) | |
| UTI | | 17 (2.3%) | | | 17 (2.3%) | |
| AKI | | 15 (2.0%) | | | 23 (3.1%) | |
| Peripheral edema | | 15 (2.0%) | | | 14 (1.9%) | |
| Cardiac failure | | 13 (1.8%) | | | 15 (2%) | |
| CKD | | 13 (1.8%) | | | 10 (1.4%) | |
| Decreased GFR | | 13 (1.8%) | | | 16 (1.2%) | |
| Pneumonia | | 13 (1.8%) | | | 18 (2.4%) | |
| Dizziness | | 12 (1.6%) | | | 15 (2%) | |
| Fluid overload | | 11 (1.5%) | | | 3 (0.4%) | |
| Influenza | | 11 (1.5%) | | | 14 (1.9%) | |
| Nausea | | 11 (1.5%) | | | 8 (1.1%) | |
| Myocardial infarction | | 9 (1.2%) | | | 8 (1.1%) | |
| Acute respiratory failure | | 9 (1.2%) | | | 17 (2.3%) | |
| Atrial fibrillation | | 9 (1.2%) | | | 5 (0.7%) | |
| Dyslipidemia | | 9 (1.2%) | | | 19 (2.6) | |
| Cough | | 9 (1.2%) | | | 7 (0.9%) | |
| Pyrexia | | 9 (1.2%) | | | 3 (0.4%) | |
| Cardiac failure acute | | 8 (1.1%) | | | 3 (0.4%) | |
| Flatulence | | 8 (1.1%) | | | 12 (1.6%) | |
| Inadequate diabetes mellitus control | | 8 (1.1%) | | | 7 (0.9%) | |
| Hyperglycemia | | 8 (1.1%) | | | 4 (0.5%) | |
| Metabolic acidosis | | 8 (1.1%) | | | 15 (2%) | |
| Oropharyngeal pain | | 8 (1.1%) | | | 8 (1.1%) | |
| Death | | 105 (14.2%) | | | 103 (14%) | |
| Bushinsky (2017) (2) | Side effect | veverimer 1.5 gr BD | veverimer 6 gr QD | veverimer 3 gr BD | veverimer 4.5 gr BD | Veverimer (in total) | placebo |
| Overall (any side effects reported) | 13 (52%) | 17 (61%) | 9 (36%) | 17 (65 %) | 56 (54%) | 14 (45%) |
| Diarrhea | 9 (36 %) | 3 (11%) | 3 (12 %) | 6 (23 %) | 21 (20%) | 4 (13 %) |
| Headache | 4 (16%) | 1 (4%) | 1 (4%) | 2 (8%) | 8 (8%) | 1 (3%) |
| Constipation | 1 (4%) | 3 (11%) | 1 (4%) | 2 (8%) | 7 (7%) | 0 |
| Hyperglycemia | 0 | 3 (11%) | 2 (8%) | 2 (8%) | 7 (7%) | 0 |
| Hypoglycemia | 2 (8%) | 0 | 1 (4%) | 2 (8%) | 5 (5%) | 2 (6%) |
| Hypertension | 1 (4%) | 2 (7%) | 0 | 2 (8%) | 5 (5%) | 1 (3%) |
| Decreased GFR | 2 (8%) | 0 | 1 (4%) | 1 (4%) | 4 (4%) | 2 (6%) |
| Blood glucose increase | 1 (4%) | 1 (4%) | 0 | 0 | 2 (2%) | 2 (6%) |
| Wesson (2019) (3) | Side effect | veverimer | | | placebo | | |
| Total side effects | 67 (54%) | | | 43 (46%) | | |
| Total gastrointestinal disorders | 21 (17%) | | | 8 (9%) | | |
| Diarrhea | 11 (9%) | | | 3 (3%) | | |
| Metabolic/nutritional disorders | 16 (13%) | | | 8 (9%) | | |
| Hyperkalemia | 13 (10%) | | | 6 (6%) | | |
| Total nervous system disorders | 8 (6%) | | | 6 (6%) | | |
| Headache | 7 (6%) | | | 4 (4%) | | |
| Flatulence | 21 (17%) | | | 8 (9%) | | |
| AKI | 1 (0.08%) | | | 1 (1.07%) | | |
| Death | 0 | | | 2 (2.14%) from unstable angina, and pneumonia | | |
| Wesson (2019) (4) | Side effect | veverimer | | | placebo | | |
| Death | 0 | | | 2 (2%) | | |
| Any adverse events | 91 (81%) | | | 65 (80%) | | |
| Serious adverse events | 2 (2%) | | | 4 (5%) | | |
| Adverse events related to the drug | 11 (10%) | | | 12 (15%) | | |
| Premature discontinuation due to adverse events | 0 | | | 1 (1%) | | |
| Dialysis | 0 | | | 1 (1%) | | |
| Headache | 17 (15%) | | | 20 (25%) | | |
| Hyperkalemia | 16 (14%) | | | 9 (11%) | | |
| Influenza | 12 (11%) | | | 6 (7%) | | |
| Flatulence | 8 (7%) | | | 5 (6%) | | |
| Diarrhea | 7 (6%) | | | 5 (6%) | | |
| Cough | 7 (6%) | | | 3 (4%) | | |
| Anemia | 6 (5%) | | | 1 (1%) | | |
| Renal impairment | 5 (4%) | | | 7 (9%) | | |

**Table S4: adverse events reported in either of case or control groups of included studies.** UTI: urinary tract infection, AKI: acute kidney injury, GFR: glomerular filtration rate, CKD: chronic kidney disease, BD: bis in die (=twice daily), QD: quaque die (=once a day).

1. Tangri N, Mathur VS, Bushinsky DA, Klaerner G, Li E, Parsell D, et al. VALOR-CKD: A Multicenter, Randomized, Double-Blind Placebo-Controlled Trial Evaluating Veverimer in Slowing Progression of CKD in Patients with Metabolic Acidosis. J Am Soc Nephrol. 2024;35(3):311-20.

2. Bushinsky DA, Hostetter T, Klaerner G, Stasiv Y, Lockey C, McNulty S, et al. Randomized, Controlled Trial of TRC101 to Increase Serum Bicarbonate in Patients with CKD. Clin J Am Soc Nephrol. 2018;13(1):26-35.

3. Wesson DE, Mathur V, Tangri N, Stasiv Y, Parsell D, Li E, et al. Veverimer versus placebo in patients with metabolic acidosis associated with chronic kidney disease: a multicentre, randomised, double-blind, controlled, phase 3 trial. Lancet. 2019;393(10179):1417-27.

4. Wesson DE, Mathur V, Tangri N, Stasiv Y, Parsell D, Li E, et al. Long-term safety and efficacy of veverimer in patients with metabolic acidosis in chronic kidney disease: a multicentre, randomised, blinded, placebo-controlled, 40-week extension. Lancet. 2019;394(10196):396-406.
