# Supplementary material for: Veverimer in Treating Metabolic Acidosis in Chronic Kidney Disease Patients: A Systematic Review and Meta-Analysis of Randomized Clinical Trials
Source: Research Square preprint supplement (doi:10.21203/rs.3.rs-6531618/v1), 2025-05-08
Supplement: Supplementary file 3 [file e98300af87999dd31a0a1e47.docx]

| **Author (year)** | **Inclusion criteria** | **Exclusion criteria** | **Comorbidities (veverimer vs. placebo)** | **Cause of CKD (veverimer vs. placebo)** |
| --- | --- | --- | --- | --- |
| Tangri (2024) (1) | **For enrollment:**   - 18 to 85 years of age at first visit. - Mean eGFR of two tests: 20 to 40 mL/min/1.73m2 by CKD-EPI - Stable renal function (eGFR values not differ by > 20% of higher GFR. - Three serum bicarbonate values in the range of 12-20 mEq/L, One pre-dose. - Mean blood pressure < 160/92 mmHg at the Screening 2 Visit. - Receiving treatment with an ACEi/ ARB at the maximum tolerated dose without adjustments for ≥ 4 weeks before and during Screening. - If receiving an oral alkali supplement: stable dose for ≥ 2 weeks before and during the Screening Period. - HbA1c ≤ 11.0% at the first visit. - Adequate peripheral venous access - For women with childbearing potential: negative pregnancy tests at the Screening 1 and Part B Day 1 Visits, willingness to use acceptable birth control methods during the entire study until 1 week after completion.   **For randomization:**   - An increase from Baseline Bicarbonate of ≥4 mmol/L or a serum bicarbonate value ≥22 mmol/L during Part A. | **For enrolment:**   - Serum bicarbonate level requiring emergency intervention or indicating an acute acidotic process at any Screening visits. - Anuria, dialysis, or acute kidney injury in the 3 months before the first visit. - COPD being treated with chronic oral steroids and requiring oxygenation, or hospitalization within the previous 6 months. - Heart failure with maximum NYHA Class IV symptoms during the 3 months before the Screening 1 Visit. - Heart, liver, or kidney transplant. - A plan of renal replacement therapy (dialysis or transplantation) within 6 months following randomization. - history of stroke or TIA within the 6 months before the first visit. - History of a cardiac event within 3 months before first visit, including MI, ACS, CABG, PCI, valve procedure, and inpatient or outpatient treatment for ADHF. - Hospitalization for any reason during the 2 months before the first visit, other than for pre-planned diagnostic or minor invasive procedures (e.g., placement of dialysis access). - Liver enzymes ALT, AST, or total bilirubin values > 3× the upper limit of normal at the Screening 2 Visit. - Corrected serum calcium <8.0 mg/dL at the first visit. - Having an active cancer during the 1 year before the first visit or an undertreatment cancer other than non-melanoma skin cancer or low-grade cervical carcinoma.   *Subjects with cancers being treated with hormonal therapy only permitted with the approval of the Medical Monitor*   - receiving any investigational drug during the last month (*28 days or ≥5 half-lives [if known], whichever is longer*) preceding the first visit or during the Screening period. - Being allergic to placebo (microcrystalline cellulose). - Inability to consume the study drug or comply with protocol. - Receiving cytotoxic, immunosuppressive, or other immunotherapy for renal disease within 6 months before the first visit or during the Screening Period. - History of alcoholism or drug/chemical abuse within 6 months before the first visit. - Having any medical conditions with uncontrolled systemic disease or serious concurrent illness that would significantly decrease study compliance or jeopardize the safety of the subject or affect the interpretability of the subject’s data. - Having Participated (i.e., was randomized) in Study TRCA-301. - Pregnant or currently breastfeeding.   **For randomization:**   - Confirmed eGFR decline of ≥40 from the mean of the eGFR values from the Screening 1 and Screening 2 Visits. - receiving dialysis or a kidney transplant during Part A. - pregnant or currently breastfeeding. - Having significant non-compliance with study requirements during Part A or any medical condition, uncontrolled systemic disease, or serious concurrent illness that would significantly decrease study compliance or jeopardize the safety of the subject or affect the interpretability of the subject’s data. | HTN: 726 (98.0%) vs. 724 (98.0%)  DM: 423 (57.1%) vs. 399 (54%)  Heart failure: 230 (31%) vs. 241 (32.6%) | NA |
| Wessen (2019) (2) | - non-dialysis-dependent CKD - adequate peripheral venous access - completion of 12-week parent study - Serum bicarbonate ≥ 12 mmol/L | - Serum bicarbonate level requiring emergency intervention or indicating an acute acidotic process at any Screening visits. - Requirement for dialysis for acute kidney injury or worsening chronic kidney disease during the parent study; - Planned kidney replacement therapy within 6 months. - Recent history or current diagnosis of cancer, clinically significant diabetic gastroparesis, bariatric surgery, bowel obstruction, swallowing disorders, severe gastrointestinal disorders, inflammatory bowel disease, major gastrointestinal surgery or active gastric or duodenal ulcers, - Serum calcium concentration of 2 mmol/L or less at week 10 of the parent study. | HTN: 110 (96%) vs. 79 (96%)  DM: 70 (61%) vs. 57 (70%)  Dyslipidemia: 70 (61%) vs. 48 (59%)  LVH: 56 (49%) vs. 35 (43%)  CHF: 34 (30%) vs. 28 (34%)  PCI or CABG: 19 (17%) vs. 14 (17%)  MI: 17 (15%) vs. 10 (12%)  Stroke: 8 (7%) vs. 8 (10%)  AF or atrial flutter: 7 (6%) vs. 6 (7%)  PVD: 5 (4%) vs. 6 (7%)  PVD intervention or surgical arterial bypass: 1 (1%) vs. 3 (4%)  TIA: 1 (1%) vs 0 (0%) | HTN: 36 (32%) vs. 27 (33%) DM and HTN: 37 (32%) vs. 23 (28%)  DM: 15 (13%) vs. 18 (22%) glomerulonephritis: 7 (6%) vs. 7 (9%) interstitial nephritis: 6 (5%) vs. 3 (4%) cystic renal disease: 5 (4%) vs. 3 (4%) Other, unknown, or urological: 8 (7%) vs. 1(1%) |
| Wessen (2019) (3) | - non­dialysis-dependent CKD - 18 to 85 years of age - Systolic blood pressure < 170 mm Hg - Hb A1c of ≤9% - First two fasting bicarbonate values and the average of all three tests within the range of 12–20 mmol/L. - Two eGFR values in the range of 20–40 mL/min per 1·73 m² and not different by more than 20% | - Serum bicarbonate level requiring emergency intervention or indicating an acute acidotic process at any Screening visits. - Anuria, dialysis, or acute or chronic worsening renal function (≥30% decline in eGFR) in the 3 months before the first visit - Recent history of COPD, heart failure with NYHA Class IV symptoms, stroke, TIA, cancer, cardiac event, diabetic gastroparesis, bariatric surgery, bowel obstruction, swallowing disorders, severe gastrointestinal disorders, or hospitalization other than for pre­planned diagnostic or minor invasive procedures - Heart or kidney transplantation and planned initiation of renal replacement therapy within 12 weeks; - Liver enzymes (ALT, AST, or total bilirubin) more than three times the upper limit of normal - Serum calcium 2 mmol/L or less, Serum potassium less than 3.8 mmol/L or more than 5.9 mmol/L. | HTN: 120 (97%) vs. 90 (97%)  DM: 76 (61%) vs. 65 (70%)  Dyslipidaemia: 73 (59%) vs. 50 (54%)  LVH: 58 (47%) vs. 38 (41%)  CHF: 36 (29%) vs. 31 (33%)  PCI or CABG: 22 (18%) vs. 18 (19%)  MI: 18 (15%) vs. 13 (14%)  Stroke: 9 (7%) vs. 11 (12%)  PVD: 5 (4%) vs. 9 (10%)  AF or atrial flutter: 7 (6%) vs. 6 (6%)  PVD intervention or surgical arterial bypass: 1 (1%) vs. 3 (3%)  TIA: 1 (1%) vs. 0 (0%) | DM and HTN: 41 (33%) vs. 28 (30%) HTN: 37 (30%) vs. 29 (31%) DM: 17 (14%) vs. 19 (20%) Glomerulonephritis: 8 (6%) vs. 8 (9%) Interstitial nephritis: 7 (6%) vs. 3 (3%) Cystic renal disease: 5 (4%) vs. 4 (4%) Other: 9 (7%) vs. 2 (2%) |
| Bushinsky (2017) (4) | - eGFR 20 to 60 - Serum bicarbonate of 12–20 mEq/L - Stable kidney function (eGFR values at screening and day 1 within the required range and not different by >25%. - HbA1c ≤9.0% - Fasting serum glucose ≤250 mg/dl - systolic BP <170 mm Hg | - low serum bicarbonate at screening or day 1 that, in the opinion of the investigator required emergency intervention. - Dialysis or AKI in the past 3 months, - Serum potassium values of <3.8 or >5.9 mEq/L at screening - Severe comorbid conditions | DM:  Placebo: 20 (65%)  Veverimer:  1.5 g BD: 18 (72%)  6 g Daily: 17 (61%)  3 g BD: 20 (80%)  4.5 g BD: 19 (73%)  Combined: 74 (71%)  HTN  Placebo: 30(97%)  Veverimer:  1.5 g BD: 24 (96%)  6 g Daily: 26 (93%)  3 g BD: 23 (92%)  4.5 g BD: 23 (88%)  Combined: 96 (92%)  Heart failure  Placebo: 7(23%)  Veverimer:  1.5 g BD: 5 (20%)  6 g Daily: 5 (18%)  3 g BD: 7 (28%)  4.5 g BD: 5 (19%) Combined: 22 (21%)  LVH  Placebo: 8(26%)  Veverimer: 1.5 g BD: 7(28%)  6 g Daily: 8 (29%)  3 g BD: 7 (28%)  4.5 g BD: 9 (35%) Combined: 31 (30%)  Peripheral edema  Placebo: 4(13%)  Veverimer:  1.5 g BD: 3 (12%)  6 g Daily: 4 (14%)  3 g BD: 4 (16%)  4.5 g BD: 4 (15%)  Combined: 15 (14%) | DM and HTN: 54%  HTN: 19%  DM: 10%  Glomerulonephritis: 10%  cystic kidney disease: 7%  interstitial nephritis: 1% |

**Table S3: inclusion/exclusion criteria and baseline comorbidities of studies’ participants.** CKD: chronic kidney disease, CKD-EPI: chronic kidney disease epidemiology collaboration, eGFR: estimated glumeral filteration rate, COPD: chronic obstructive pulmonary disease, NYHA class: New York heart association class, ACEI: angiotensin convertizg enzyme inhibitor, ARB: angiotensin receptor blocker, MI: myocardial infarction, ACS: acute coronary syndrome, CABG: coronary artery bypass grafting, PCI:percutaneous coronary intervention, ADHF: acute decompensated heart failure, LVH: left ventricular hypertrophy, CHF: congestive heart failure, AF: atrial fibrillation, PVD: peripheral vascular disease, TIA: Transient ischemic attack, BMI:body mass index, DM: diabetes mellitus, HTN: hypertension

1. Tangri N, Mathur VS, Bushinsky DA, Klaerner G, Li E, Parsell D, et al. VALOR-CKD: A Multicenter, Randomized, Double-Blind Placebo-Controlled Trial Evaluating Veverimer in Slowing Progression of CKD in Patients with Metabolic Acidosis. J Am Soc Nephrol. 2024;35(3):311-20.

2. Wesson DE, Mathur V, Tangri N, Stasiv Y, Parsell D, Li E, et al. Long-term safety and efficacy of veverimer in patients with metabolic acidosis in chronic kidney disease: a multicentre, randomised, blinded, placebo-controlled, 40-week extension. Lancet. 2019;394(10196):396-406.

3. Wesson DE, Mathur V, Tangri N, Stasiv Y, Parsell D, Li E, et al. Veverimer versus placebo in patients with metabolic acidosis associated with chronic kidney disease: a multicentre, randomised, double-blind, controlled, phase 3 trial. Lancet. 2019;393(10179):1417-27.

4. Bushinsky DA, Hostetter T, Klaerner G, Stasiv Y, Lockey C, McNulty S, et al. Randomized, Controlled Trial of TRC101 to Increase Serum Bicarbonate in Patients with CKD. Clin J Am Soc Nephrol. 2018;13(1):26-35.
