# Supplementary material for: Veverimer in Treating Metabolic Acidosis in Chronic Kidney Disease Patients: A Systematic Review and Meta-Analysis of Randomized Clinical Trials
Source: Research Square preprint supplement (doi:10.21203/rs.3.rs-6531618/v1), 2025-05-08
Supplement: Supplementary file 4 [file ffa9c88c1babcee3af0f722c.docx]

|  | | **INTERNAL VALIDITY Bias** | | | | | | | | | | **STATISTICAL CONCLUSION VALIDITY** | | |
| --- | --- | --- | --- | --- | --- | --- | --- | --- | --- | --- | --- | --- | --- | --- |
| **Study** | **OUTCOME** | **1** | **2** | **3** | **4** | **5** | **6** | **7** | **8** | **9** | **10** | **11** | **12** | **13** |
| Tangri (2024) (1) | GFR | Y | Y | Y | Y | Y | Y | N/A | Y | Y | Y | Y | Y | Y |
| Serum bicarbonate | N/A | Y | Y | Y | Y | Y |
| Wesson (2019) (2) | Serum bicarbonate | Y | Y | Y | Y | Y | Y | Y | Y | Y | Y | Y | Y | Y |
| KDQOL SF-36 physical function | Y | Y | Y | Y | Y | Y |
| Wesson (2019) (3) | Serum bicarbonate | Y | U | Y | Y | Y | Y | Y | Y | Y | Y | Y | Y | Y |
| KDQOL SF-36 physical functions | Y | Y | Y | Y | Y | Y |
| Bushinsky (2017) (4) | KDQOL SF-36 physical function | Y | U | Y | Y | Y | U | Y | Y | Y | Y | Y | Y | Y |

Table S2. Appraisal of the included studies. GFR: glomerular filtration rate, KDQOL SF-36: Kidney Disease and Quality of Life Short Form-36, Y: yes, N/A: not applicable, U: unclear

1. Tangri N, Mathur VS, Bushinsky DA, Klaerner G, Li E, Parsell D, et al. VALOR-CKD: A Multicenter, Randomized, Double-Blind Placebo-Controlled Trial Evaluating Veverimer in Slowing Progression of CKD in Patients with Metabolic Acidosis. J Am Soc Nephrol. 2024;35(3):311-20.

2. Wesson DE, Mathur V, Tangri N, Stasiv Y, Parsell D, Li E, et al. Veverimer versus placebo in patients with metabolic acidosis associated with chronic kidney disease: a multicentre, randomised, double-blind, controlled, phase 3 trial. Lancet. 2019;393(10179):1417-27.

3. Wesson DE, Mathur V, Tangri N, Stasiv Y, Parsell D, Li E, et al. Long-term safety and efficacy of veverimer in patients with metabolic acidosis in chronic kidney disease: a multicentre, randomised, blinded, placebo-controlled, 40-week extension. Lancet. 2019;394(10196):396-406.

4. Bushinsky DA, Hostetter T, Klaerner G, Stasiv Y, Lockey C, McNulty S, et al. Randomized, Controlled Trial of TRC101 to Increase Serum Bicarbonate in Patients with CKD. Clin J Am Soc Nephrol. 2018;13(1):26-35.
